# Supplementary material for: Capturing GEI Patterns for Quality Traits in Biparental Wheat Populations
Source: MDPI journal article supplement (doi:10.3390/agronomy11061022), 2021-05-21
Supplement: s1 [file s1]

## Supplementary Figures

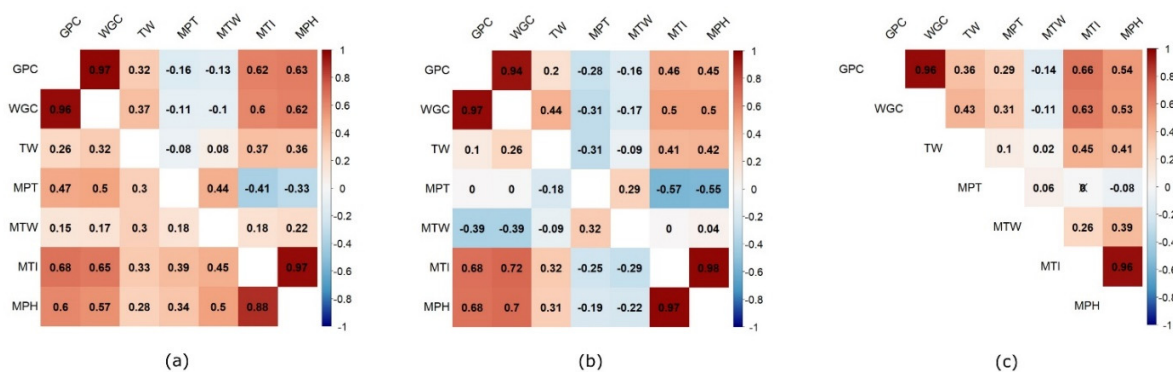

**Figure S1:** Pearson's correlation coefficients across environments for BK population. Years of experiment are marked as following: (a) 2009, (b) 2010, and (c) 2011. The data in the upper-right triangle represent the location Osijek, while those in the lower-left triangle represent location Slavonski Brod.

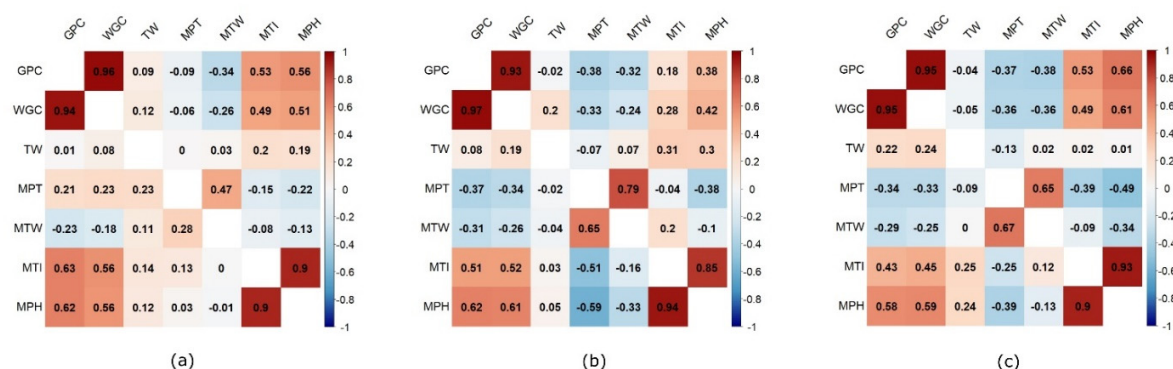

**Figure S2:** Pearson's correlation coefficients across environments for MG population. Years of experiment are marked as following: (a) 2009, (b) 2010, and (c) 2011. The data in the upper-right triangle represent the location Osijek, while those in the lower-left triangle represent location Slavonski Brod.

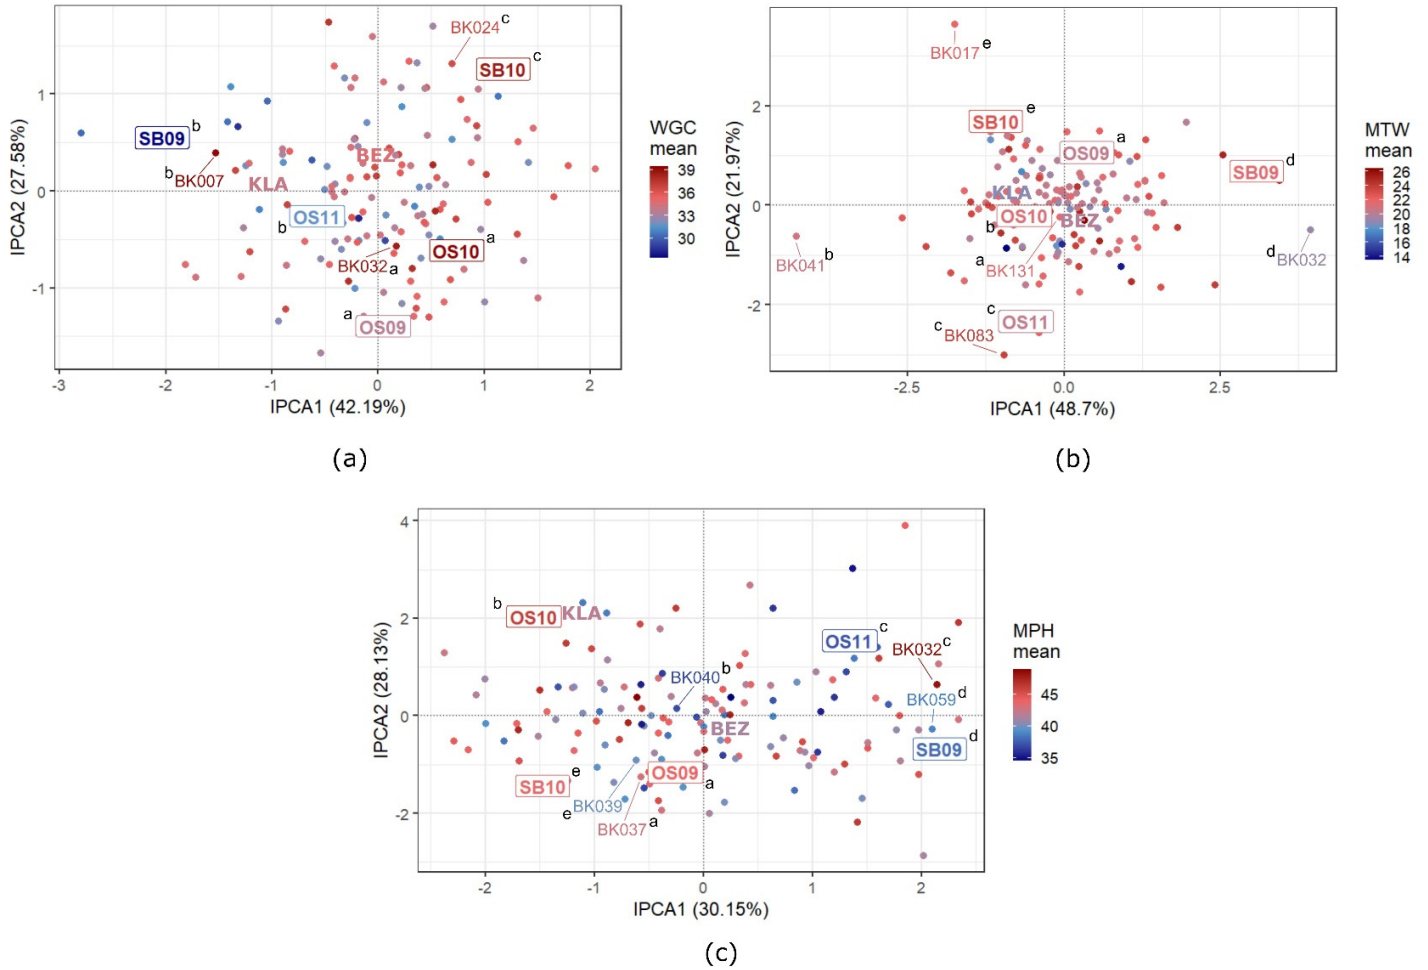

**Figure S3:** Modified AMMI2 biplots for (a) WGC, (b) MTW, and (c) MPH traits of BK RIL population. RILs are marked with dots, while environments and parental cultivars (Bezostaya-1 and Klara) are marked by abbreviated labels (with or without a frame, respectively). Within each environment one “winning” RIL is labeled and linked with its winning environment by a matching super/subscripted letter. The color indicates the mean value of the trait.

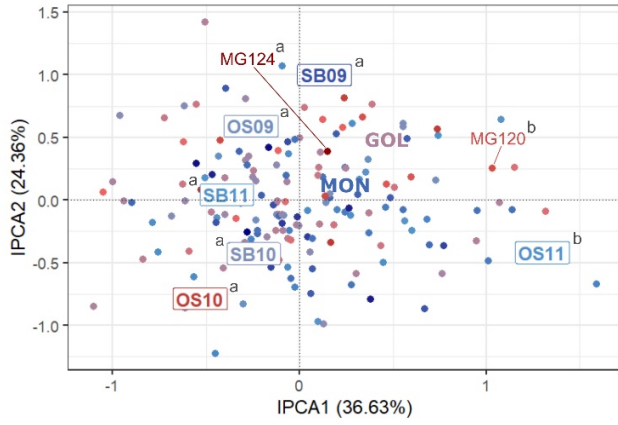

(a)

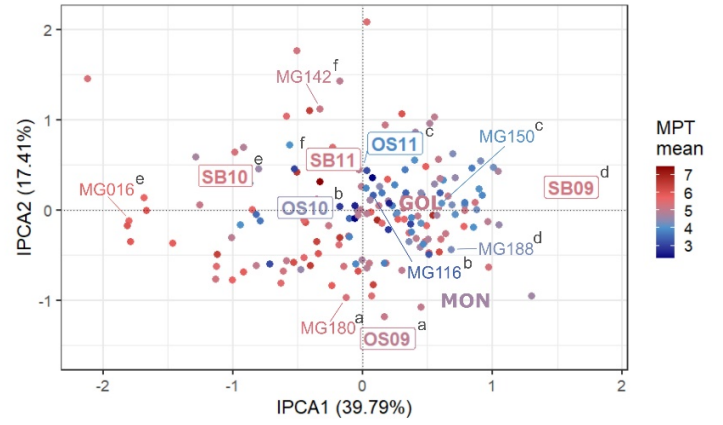

(b)

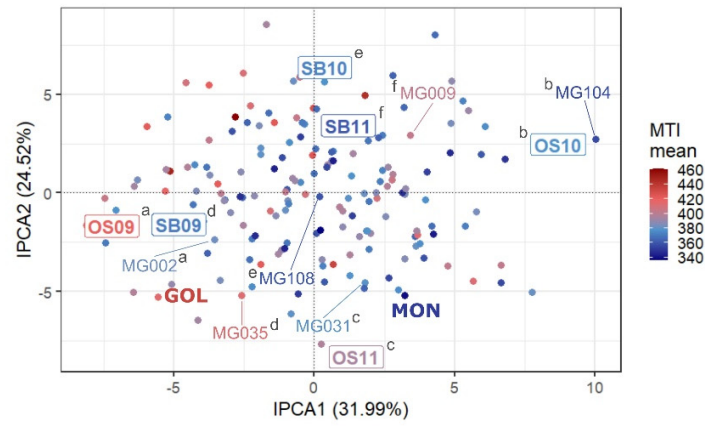

(c)

**Figure S4:** Modified AMMI2 biplots for (a) GPC, (b) MPT, and (c) MTI traits of MG RIL population. RILs are marked with dots, while environments and parental cultivars (Monika and Golubica) are marked by abbreviated labels (with or without a frame, respectively). Within each environment one “winning” RIL is labeled and linked with its winning environment by a matching super/subscripted letter. The color indicates the mean value of the trait.

## Supplementary Tables

**Table S1.** Average daily temperatures (°C) per location during three growing seasons (from planting to harvesting).

| Month          | 2008/09      |                | 2009/10      |                | 2010/11     |                |
|----------------|--------------|----------------|--------------|----------------|-------------|----------------|
|                | Osijek       | Slavonski Brod | Osijek       | Slavonski Brod | Osijek      | Slavonski Brod |
| X              | 13           | 12.2           | 11.5         | 11             | 9.1         | 8.9            |
| XI             | 7.5          | 7.3            | 8.2          | 7.8            | 8.9         | 8.1            |
| XII            | 3.8          | 3.8            | 3.1          | 3.4            | 0.2         | 0.3            |
| I              | -1.1         | -1.6           | -0.8         | 0              | 1.1         | 0.8            |
| II             | 2.3          | 2.9            | 1.4          | 1.8            | 0.7         | 1              |
| III            | 6.8          | 7.1            | 6.8          | 6.8            | 6.4         | 6.4            |
| IV             | 14.6         | 14.2           | 12.4         | 12.3           | 13.2        | 13.1           |
| V              | 18.3         | 18.1           | 16.5         | 16.2           | 16.7        | 16.3           |
| VI             | 19.2         | 19.3           | 20.4         | 20.2           | 20.8        | 20.6           |
| VII            | 23.2         | 22.6           | 23.2         | 22.7           | 22.2        | 22.6           |
| <b>Average</b> | <b>10.76</b> | <b>10.59</b>   | <b>10.27</b> | <b>10.22</b>   | <b>9.93</b> | <b>9.81</b>    |

**Table S2.** Rainfalls (mm) per location during three growing seasons (from planting to harvesting).

| Month        | 2008/09      |                | 2009/10    |                | 2010/11      |                |
|--------------|--------------|----------------|------------|----------------|--------------|----------------|
|              | Osijek       | Slavonski Brod | Osijek     | Slavonski Brod | Osijek       | Slavonski Brod |
| X            | 34.4         | 44.2           | 55.3       | 45             | 67.1         | 58.2           |
| XI           | 44.9         | 64.9           | 67.8       | 68.1           | 56.3         | 71.5           |
| XII          | 40.5         | 46.8           | 100.8      | 106.1          | 73.5         | 68.5           |
| I            | 60.3         | 62.9           | 83.9       | 79.5           | 23.6         | 27.2           |
| II           | 28.6         | 26.2           | 58.6       | 81.8           | 18.4         | 16.6           |
| III          | 26.5         | 41.4           | 22.2       | 49.5           | 37.1         | 35.9           |
| IV           | 18.7         | 13             | 71.1       | 52.9           | 19.4         | 17.7           |
| V            | 39.4         | 43.6           | 120.8      | 161.4          | 81.2         | 43.8           |
| VI           | 62.8         | 103.8          | 234        | 176.9          | 49.9         | 47.4           |
| VII          | 13.8         | 61.1           | 31.5       | 42.3           | 73.9         | 108.7          |
| <b>Total</b> | <b>369.9</b> | <b>507.9</b>   | <b>846</b> | <b>863.5</b>   | <b>500.4</b> | <b>495.5</b>   |

**Table S3.** Soil temperatures (°C) at 5 cm soil depth per location during three growing seasons (from planting to harvesting).

| Month          | 2008/09     |                | 2009/10     |                | 2010/11     |                |
|----------------|-------------|----------------|-------------|----------------|-------------|----------------|
|                | Osijek      | Slavonski Brod | Osijek      | Slavonski Brod | Osijek      | Slavonski Brod |
| X              | 13.9        | 13.9           | 13.4        | 13.3           | 10.6        | 11.5           |
| XI             | 8.5         | 8.4            | 8.3         | 8.3            | 8.6         | 8.7            |
| XII            | 4.5         | 4.2            | 4.8         | 4.8            | 2.3         | 2.2            |
| I              | 0.4         | 0.8            | 1.6         | 1.7            | 1.6         | 1.5            |
| II             | 2.8         | 3.2            | 1.9         | 2.0            | 1.5         | 2.0            |
| III            | 6.9         | 7.3            | 6.7         | 7.2            | 6.2         | 6.9            |
| IV             | 15.0        | 15.4           | 13.9        | 13.6           | 13.6        | 14.8           |
| V              | 21.5        | 21.0           | 18.3        | 18.4           | 18.4        | 19.4           |
| VI             | 22.8        | 21.7           | 22.8        | 21.9           | 23.8        | 24.1           |
| VII            | 27.1        | 26.1           | 25.8        | 26.0           | 25.0        | 25.7           |
| <b>Average</b> | <b>12.3</b> | <b>12.2</b>    | <b>11.8</b> | <b>11.7</b>    | <b>11.2</b> | <b>11.7</b>    |

**Table S4.** Structure of nested effects in optimal models for each trait in both RIL populations examined.

| Trait | Population | Environments <sup>1</sup> |                  |                   |
|-------|------------|---------------------------|------------------|-------------------|
|       |            | Rep                       | Row              | Col               |
| GPC   | BK         | 3                         | All <sup>2</sup> | 2, 4, 5           |
|       | MG         | 1, 3                      | All              | 1, 3, 4, 5        |
| WGC   | BK         | Single <sup>3</sup>       | All              | 4, 5              |
|       | MG         | 1, 3, 6                   | 1, 3, 4, 5, 6    | All               |
| TW    | BK         | Single                    | 1, 2, 4, 5       | 2, 4, 5           |
|       | MG         | 1, 2, 5, 6                | 2, 4, 5, 6       | 2, 4, 6           |
| MPT   | BK         | 2, 5                      | 2, 3, 4, 5       | 4, 5              |
|       | MG         | 1, 3, 5                   | 4, 5, 6          | 1, 3, 4, 6        |
| MTW   | BK         | 2                         | 4                | 2, 4              |
|       | MG         | Single                    | Single           | None <sup>4</sup> |
| MTI   | BK         | Single                    | 2, 3, 4, 5       | 2, 4, 5           |
|       | MG         | 1, 2, 3, 6                | 1, 3, 4, 5, 6    | 3, 4              |
| MPH   | BK         | 3, 5                      | 2, 3, 4, 5       | 4, 5              |
|       | MG         | Single                    | All              | All               |

<sup>1</sup> Numbers indicate environments for which this effect was included (1 – OS09, 2 – OS10, 3 – OS11, 4 – SB09, 5 – SB10, 6 – SB11).

<sup>2</sup> „All“ indicates different effect in all environments.

<sup>3</sup> „Single“ indicates unique effects for all environments.

<sup>4</sup> „None“ indicates that model did not include this effect.

**Table S5.** Summary of parental means, RIL means and ranges, and rates of transgressive segregants within environments for seven quality traits assessed in BK RIL wheat population.

| Trait            | Parental cultivars |       | RILs  |       |       | Positive                |               | Negative                |      |
|------------------|--------------------|-------|-------|-------|-------|-------------------------|---------------|-------------------------|------|
|                  | Mean               |       |       |       |       | transgressive           | transgressive |                         |      |
|                  | Bezostaya-1        | Klara | Min   | Mean  | Max   | segregants <sup>1</sup> | %             | segregants <sup>2</sup> | %    |
| OS09 environment |                    |       |       |       |       |                         |               |                         |      |
| GPC              | 14.1               | 13.9  | 11.9  | 14.1  | 15.9  | 74                      | 51.8          | 57                      | 39.9 |
| WGC              | 33.4               | 33.7  | 25.6  | 33.6  | 39.5  | 73                      | 51.1          | 63                      | 44.1 |
| TW               | 81.4               | 82.0  | 77.0  | 81.6  | 84.5  | 64                      | 44.8          | 57                      | 39.9 |
| MPT              | 5.8                | 5.2   | 3.4   | 5.8   | 7.7   | 74                      | 51.8          | 43                      | 30.1 |
| MTW              | 19.3               | 16.9  | 12.4  | 20.4  | 27.8  | 104                     | 72.7          | 8                       | 5.6  |
| MTI              | 373.8              | 320.5 | 249.8 | 363.5 | 463.4 | 58                      | 40.6          | 13                      | 9.1  |
| MPH              | 45.6               | 39.4  | 29.8  | 43.9  | 55.1  | 49                      | 34.3          | 21                      | 14.7 |
| OS10 environment |                    |       |       |       |       |                         |               |                         |      |
| GPC              | 16.0               | 14.9  | 13.9  | 15.7  | 17.5  | 47                      | 32.9          | 29                      | 20.3 |
| WGC              | 39.9               | 37.7  | 32.9  | 39.4  | 43.9  | 64                      | 44.8          | 33                      | 23.1 |
| TW               | 73.9               | 76.8  | 64.8  | 75.3  | 79.8  | 53                      | 37.1          | 38                      | 26.6 |
| MPT              | 6.9                | 4.6   | 2.5   | 5.8   | 9.2   | 27                      | 18.9          | 21                      | 14.7 |
| MTW              | 20.8               | 20.8  | 13.9  | 21.2  | 29.6  | 71                      | 49.7          | 71                      | 49.7 |
| MTI              | 378.0              | 456.1 | 311.3 | 409.5 | 504.9 | 14                      | 9.8           | 27                      | 18.9 |
| MPH              | 43.0               | 52.5  | 36.7  | 46.2  | 58.9  | 11                      | 7.7           | 37                      | 25.9 |
| OS11 environment |                    |       |       |       |       |                         |               |                         |      |
| GPC              | 12.7               | 12.7  | 11.0  | 12.5  | 14.6  | 54                      | 37.8          | 88                      | 61.5 |
| WGC              | 32.5               | 32.5  | 26.4  | 31.6  | 37.3  | 48                      | 33.6          | 94                      | 65.7 |
| TW               | 85.1               | 84.2  | 78.9  | 84.1  | 86.9  | 30                      | 20.9          | 69                      | 48.3 |
| MPT              | 4.2                | 2.9   | 1.3   | 4.6   | 9.9   | 82                      | 57.3          | 18                      | 12.6 |
| MTW              | 18.3               | 17.7  | 14.7  | 20.4  | 30.3  | 108                     | 75.5          | 22                      | 15.4 |
| MTI              | 342.7              | 359.8 | 259.1 | 328.6 | 418.4 | 24                      | 16.8          | 97                      | 67.8 |
| MPH              | 37.7               | 38.9  | 28.4  | 37.1  | 51.2  | 43                      | 30.1          | 86                      | 60.1 |
| SB09 environment |                    |       |       |       |       |                         |               |                         |      |
| GPC              | 12.5               | 12.6  | 10.6  | 12.4  | 14.9  | 49                      | 34.3          | 86                      | 60.1 |
| WGC              | 27.7               | 28.7  | 20.5  | 27.4  | 35.6  | 41                      | 28.7          | 81                      | 56.6 |
| TW               | 79.6               | 79.3  | 73.7  | 79.3  | 82.5  | 66                      | 46.2          | 67                      | 46.9 |
| MPT              | 5.0                | 4.9   | 1.3   | 5.1   | 8.2   | 79                      | 55.2          | 60                      | 41.9 |
| MTW              | 21.1               | 16.3  | 10.8  | 21.7  | 35.1  | 67                      | 46.9          | 3                       | 2.1  |
| MTI              | 304.1              | 290.9 | 237.3 | 323.5 | 411.3 | 96                      | 67.1          | 26                      | 18.2 |
| MPH              | 36.7               | 34.9  | 25.5  | 38.0  | 49.8  | 88                      | 61.5          | 39                      | 27.3 |
| SB10 environment |                    |       |       |       |       |                         |               |                         |      |
| GPC              | 16.0               | 15.1  | 12.6  | 15.3  | 17.2  | 38                      | 26.6          | 58                      | 40.6 |
| WGC              | 40.1               | 37.6  | 30.7  | 38.6  | 43.9  | 44                      | 30.8          | 47                      | 32.9 |
| TW               | 75.5               | 76.9  | 65.6  | 77.4  | 81.5  | 94                      | 65.7          | 17                      | 11.9 |
| MPT              | 4.3                | 5.5   | 1.8   | 5.8   | 10.0  | 86                      | 60.1          | 24                      | 16.8 |
| MTW              | 20.9               | 22.0  | 12.1  | 22.9  | 33.3  | 87                      | 60.8          | 30                      | 21.0 |
| MTI              | 399.2              | 408.4 | 284.6 | 381.5 | 464.6 | 41                      | 28.7          | 93                      | 65.0 |
| MPH              | 44.8               | 46.3  | 32.1  | 43.6  | 53.2  | 42                      | 29.4          | 82                      | 57.3 |

<sup>1</sup> RILs that exhibited values higher than the parental cultivar with higher trait value.

<sup>2</sup> RILs that exhibited values lower than the parental cultivar with lower trait value.

**Table S6.** Summary of parental means, RIL means and ranges, and rates of transgressive segregants within environments for seven quality traits assessed in MG RIL wheat population.

| Trait            | Parental cultivars |          | RILs  |       |       | Positive                |               | Negative                |      |
|------------------|--------------------|----------|-------|-------|-------|-------------------------|---------------|-------------------------|------|
|                  | Mean               |          |       |       |       | transgressive           | transgressive |                         |      |
|                  | Monika             | Golubica | Min   | Mean  | Max   | segregants <sup>1</sup> | %             | segregants <sup>2</sup> | %    |
| OS09 environment |                    |          |       |       |       |                         |               |                         |      |
| GPC              | 13.1               | 14.0     | 11.6  | 13.7  | 16.1  | 55                      | 31.8          | 50                      | 28.9 |
| WGC              | 28.2               | 34.0     | 25.4  | 31.6  | 39.0  | 39                      | 22.5          | 23                      | 13.3 |
| TW               | 81.5               | 84.3     | 77.9  | 82.1  | 84.3  | 0                       | 0.00          | 44                      | 25.4 |
| MPT              | 6.4                | 5.1      | 2.0   | 4.9   | 7.6   | 31                      | 17.9          | 92                      | 53.2 |
| MTW              | 10.0               | 22.2     | 6.5   | 19.6  | 35.4  | 53                      | 30.6          | 19                      | 11.0 |
| MTI              | 359.4              | 510.4    | 329.9 | 420.8 | 527.8 | 4                       | 2.3           | 10                      | 5.8  |
| MPH              | 42.1               | 60.8     | 36.9  | 49.3  | 73.2  | 8                       | 4.6           | 20                      | 11.6 |
| OS10 environment |                    |          |       |       |       |                         |               |                         |      |
| GPC              | 14.8               | 15.1     | 13.5  | 15.3  | 17.3  | 106                     | 61.3          | 51                      | 29.5 |
| WGC              | 32.3               | 39.5     | 32.0  | 38.4  | 43.9  | 59                      | 34.1          | 1                       | 0.6  |
| TW               | 73.5               | 73.8     | 65.7  | 72.4  | 77.6  | 54                      | 31.2          | 110                     | 63.6 |
| MPT              | 3.2                | 4.7      | 1.9   | 4.4   | 8.5   | 64                      | 37.0          | 33                      | 19.1 |
| MTW              | 5.8                | 9.2      | 4.4   | 9.4   | 23.4  | 55                      | 31.8          | 13                      | 7.5  |
| MTI              | 334.0              | 394.6    | 301.6 | 377.2 | 470.8 | 47                      | 27.2          | 19                      | 11.0 |
| MPH              | 44.2               | 47.1     | 34.8  | 45.8  | 59.3  | 52                      | 30.0          | 73                      | 42.2 |
| OS11 environment |                    |          |       |       |       |                         |               |                         |      |
| GPC              | 13.0               | 14.3     | 11.1  | 13.5  | 16.2  | 28                      | 16.2          | 59                      | 34.1 |
| WGC              | 33.5               | 36.7     | 29.6  | 34.6  | 42.2  | 29                      | 16.8          | 54                      | 31.1 |
| TW               | 84.6               | 84.5     | 81.9  | 84.4  | 86.2  | 74                      | 42.8          | 89                      | 51.5 |
| MPT              | 2.9                | 3.4      | 1.8   | 3.9   | 7.4   | 126                     | 72.8          | 22                      | 12.7 |
| MTW              | 11.6               | 13.3     | 6.9   | 15.2  | 23.7  | 127                     | 73.4          | 23                      | 13.3 |
| MTI              | 442.8              | 485.4    | 327.1 | 394.0 | 489.3 | 1                       | 0.6           | 162                     | 93.6 |
| MPH              | 53.8               | 58.0     | 36.1  | 46.8  | 62.9  | 2                       | 1.2           | 157                     | 90.8 |
| SB09 environment |                    |          |       |       |       |                         |               |                         |      |
| GPC              | 12.6               | 14.0     | 10.9  | 12.9  | 15.6  | 16                      | 9.3           | 61                      | 35.3 |
| WGC              | 26.1               | 32.7     | 21.8  | 28.0  | 36.4  | 8                       | 4.6           | 40                      | 23.1 |
| TW               | 78.6               | 80.7     | 75.4  | 79.1  | 81.6  | 13                      | 7.5           | 52                      | 30.1 |
| MPT              | 6.1                | 5.7      | 2.0   | 5.3   | 8.5   | 52                      | 30.1          | 100                     | 57.8 |
| MTW              | 13.2               | 26.6     | 4.8   | 20.2  | 45.9  | 24                      | 13.9          | 26                      | 15.0 |
| MTI              | 314.6              | 442.3    | 298.7 | 370.9 | 472.7 | 4                       | 2.3           | 4                       | 2.3  |
| MPH              | 36.3               | 53.7     | 33.8  | 43.6  | 58.4  | 5                       | 2.9           | 7                       | 4.1  |
| SB10 environment |                    |          |       |       |       |                         |               |                         |      |
| GPC              | 12.8               | 13.6     | 12.1  | 13.7  | 16.3  | 97                      | 56.1          | 19                      | 11.0 |
| WGC              | 30.0               | 34.9     | 29.6  | 34.6  | 42.1  | 73                      | 42.2          | 3                       | 1.7  |
| TW               | 78.4               | 79.1     | 75.3  | 79.0  | 82.4  | 85                      | 49.1          | 51                      | 29.5 |
| MPT              | 2.8                | 4.3      | 1.6   | 5.3   | 9.1   | 122                     | 70.5          | 7                       | 4.1  |
| MTW              | 8.1                | 21.2     | 5.1   | 14.3  | 30.1  | 14                      | 8.1           | 30                      | 17.3 |
| MTI              | 347.5              | 436.9    | 285.5 | 372.4 | 502.9 | 9                       | 5.2           | 44                      | 25.4 |
| MPH              | 39.2               | 50.5     | 30.8  | 43.1  | 60.8  | 16                      | 9.3           | 47                      | 27.2 |
| SB11 environment |                    |          |       |       |       |                         |               |                         |      |
| GPC              | 12.0               | 13.3     | 11.7  | 13.5  | 16.4  | 103                     | 59.5          | 5                       | 2.9  |
| WGC              | 29.4               | 33.8     | 28.0  | 33.7  | 41.4  | 84                      | 48.6          | 9                       | 5.2  |
| TW               | 79.6               | 79.9     | 76.1  | 80.3  | 83.0  | 112                     | 64.7          | 47                      | 27.2 |
| MPT              | 6.1                | 6.1      | 2.1   | 5.2   | 8.0   | 51                      | 29.5          | 118                     | 68.2 |
| MTW              | 7.1                | 15.3     | 4.9   | 12.9  | 27.2  | 57                      | 32.9          | 24                      | 13.9 |
| MTI              | 286.7              | 363.2    | 286.7 | 360.6 | 451.4 | 76                      | 43.9          | 0                       | 0.00 |
| MPH              | 33.2               | 42.9     | 33.0  | 43.7  | 54.5  | 90                      | 52.0          | 1                       | 0.6  |

<sup>1</sup> RILs that exhibited values higher than the parental cultivar with higher trait value.

<sup>2</sup> RILs that exhibited values lower than the parental cultivar with lower trait value.

**Table S7.** Results of tests for IPCA terms for four mixograph traits containing missing values in the BK population. Tests were conducted on the imputed data sets based on different AMMI models.

|       | IPCA | MPT            |      |                  |         |         |         | MTW            |      |                  |         |         |         | MTI            |      |                  |         |         |         | MPH            |      |                  |         |         |         |
|-------|------|----------------|------|------------------|---------|---------|---------|----------------|------|------------------|---------|---------|---------|----------------|------|------------------|---------|---------|---------|----------------|------|------------------|---------|---------|---------|
|       |      | Sum of Squares |      | Simple bootstrap |         | Fr-test |         | Sum of Squares |      | Simple bootstrap |         | Fr-test |         | Sum of Squares |      | Simple bootstrap |         | Fr-test |         | Sum of Squares |      | Simple bootstrap |         | Fr-test |         |
|       |      | IPCA SS        | %    | T                | p value | F       | p value | IPCA SS        | %    | T                | p value | F       | p value | IPCA SS        | %    | T                | p value | F       | p value | IPCA SS        | %    | T                | p value | F       | p value |
| AMMI0 | 1    | 400.2          | 45.5 | 0.41             | 0.000   | 2.04    | 0.000   | 1581.1         | 53.3 | 0.46             | 0.000   | 2.45    | 0.000   | 127383.3       | 38.2 | 0.32             | 0.269   | 1.36    | 0.009   | 1993.2         | 37.4 | 0.30             | 0.650   | 1.25    | 0.042   |
|       | 2    | 268.8          | 30.6 | 0.47             | 0.001   | 1.74    | 0.000   | 797.4          | 26.9 | 0.42             | 0.084   | 1.44    | 0.005   | 111755.5       | 33.5 | 0.41             | 0.202   | 1.36    | 0.015   | 1869.9         | 35.1 | 0.40             | 0.281   | 1.32    | 0.024   |
|       | 3    | 209.9          | 23.9 | 0.69             | 0.000   | 2.22    | 0.000   | 587.2          | 19.8 | 0.54             | 0.627   | 1.16    | 0.188   | 94516.5        | 28.3 | 0.59             | 0.120   | 1.40    | 0.024   | 1470.9         | 27.6 | 0.53             | 0.761   | 1.12    | 0.254   |
| AMMI1 | 1    | 400.7          | 45.6 | 0.41             | 0.000   | 2.05    | 0.000   | 1712.4         | 55.5 | 0.48             | 0.000   | 2.68    | 0.000   | 127752.5       | 38.3 | 0.32             | 0.255   | 1.37    | 0.009   | 2008.5         | 37.7 | 0.30             | 0.606   | 1.27    | 0.036   |
|       | 2    | 268.4          | 30.5 | 0.47             | 0.001   | 1.73    | 0.000   | 798.9          | 25.9 | 0.43             | 0.061   | 1.46    | 0.003   | 111537.2       | 33.4 | 0.41             | 0.210   | 1.35    | 0.016   | 1863.0         | 34.9 | 0.40             | 0.296   | 1.32    | 0.026   |
|       | 3    | 210.2          | 23.9 | 0.69             | 0.000   | 2.23    | 0.000   | 573.7          | 18.6 | 0.54             | 0.684   | 1.14    | 0.215   | 94565.2        | 28.3 | 0.59             | 0.120   | 1.40    | 0.024   | 1463.8         | 27.4 | 0.53             | 0.792   | 1.11    | 0.275   |
| AMMI2 | 1    | 400.2          | 45.5 | 0.41             | 0.000   | 2.04    | 0.000   | 1774.3         | 56.4 | 0.49             | 0.000   | 2.77    | 0.000   | 126404.6       | 37.5 | 0.31             | 0.370   | 1.33    | 0.015   | 1999.9         | 37.5 | 0.30             | 0.630   | 1.26    | 0.039   |
|       | 2    | 268.8          | 30.6 | 0.47             | 0.001   | 1.74    | 0.000   | 800.3          | 25.4 | 0.43             | 0.059   | 1.47    | 0.003   | 116513.4       | 34.5 | 0.42             | 0.109   | 1.42    | 0.007   | 1866.4         | 35.0 | 0.40             | 0.286   | 1.32    | 0.025   |
|       | 3    | 209.9          | 23.9 | 0.69             | 0.000   | 2.22    | 0.000   | 571.6          | 18.2 | 0.54             | 0.707   | 1.13    | 0.226   | 94460.8        | 28.0 | 0.59             | 0.120   | 1.40    | 0.024   | 1466.6         | 27.5 | 0.53             | 0.777   | 1.11    | 0.265   |
| AMMI3 | 1    | 411.3          | 45.7 | 0.41             | 0.000   | 2.06    | 0.000   | 1654.6         | 54.6 | 0.47             | 0.000   | 2.58    | 0.000   | 183845.8       | 45.5 | 0.39             | 0.000   | 1.87    | 0.000   | 1970.9         | 36.6 | 0.30             | 0.772   | 1.22    | 0.063   |
|       | 2    | 266.9          | 29.6 | 0.46             | 0.004   | 1.66    | 0.000   | 797.7          | 26.3 | 0.43             | 0.064   | 1.46    | 0.004   | 125226.6       | 31.0 | 0.44             | 0.030   | 1.52    | 0.001   | 1899.7         | 35.3 | 0.40             | 0.272   | 1.33    | 0.023   |
|       | 3    | 222.8          | 24.7 | 0.71             | 0.000   | 2.37    | 0.000   | 576.7          | 19.0 | 0.54             | 0.662   | 1.15    | 0.204   | 94788.9        | 23.5 | 0.59             | 0.111   | 1.40    | 0.022   | 1514.9         | 28.1 | 0.54             | 0.639   | 1.16    | 0.193   |



**Table S8.** Results of tests for IPCA terms for four mixograph traits containing missing values in the MG population. Tests were conducted on the imputed data sets based on different AMMI models.

|       | IPCA | MPT            |      |                  |         |         |         | MTW            |      |                  |         |         |         | MTI            |      |                  |         |         |         | MPH            |      |                  |         |         |         |
|-------|------|----------------|------|------------------|---------|---------|---------|----------------|------|------------------|---------|---------|---------|----------------|------|------------------|---------|---------|---------|----------------|------|------------------|---------|---------|---------|
|       |      | Sum of Squares |      | Simple bootstrap |         | Fr-test |         | Sum of Squares |      | Simple bootstrap |         | Fr-test |         | Sum of Squares |      | Simple bootstrap |         | Fr-test |         | Sum of Squares |      | Simple bootstrap |         | Fr-test |         |
|       |      | IPCA SS        | %    | T                | p value | F       | p value | IPCA SS        | %    | T                | p value | F       | p value | IPCA SS        | %    | T                | p value | F       | p value | IPCA SS        | %    | T                | p value | F       | p value |
| AMMI0 | 1    | 337.1          | 43.7 | 0.39             | 0.000   | 1.85    | 0.000   | 3879.2         | 48.5 | 0.43             | 0.000   | 2.23    | 0.000   | 254432.1       | 36.3 | 0.32             | 0.000   | 1.37    | 0.004   | 4704.7         | 34.3 | 0.30             | 0.001   | 1.26    | 0.025   |
|       | 2    | 154.3          | 20.0 | 0.29             | 0.822   | 0.80    | 0.953   | 1560.6         | 19.5 | 0.31             | 0.390   | 0.87    | 0.855   | 195682.8       | 27.9 | 0.36             | 0.001   | 1.11    | 0.210   | 3670.4         | 26.8 | 0.34             | 0.028   | 1.00    | 0.508   |
|       | 3    | 151.4          | 19.6 | 0.40             | 0.254   | 0.66    | 0.997   | 1392.2         | 17.4 | 0.39             | 0.330   | 0.64    | 0.998   | 137255.2       | 19.6 | 0.40             | 0.301   | 0.65    | 0.998   | 2770.1         | 20.2 | 0.38             | 0.561   | 0.61    | 0.999   |
|       | 4    | 128.3          | 16.6 | 0.56             | 0.266   | 2.55    | 0.000   | 1160.2         | 14.5 | 0.54             | 0.556   | 2.35    | 0.000   | 113363.1       | 16.2 | 0.54             | 0.571   | 2.34    | 0.000   | 2567.0         | 18.7 | 0.57             | 0.156   | 2.67    | 0.000   |
| AMMI1 | 1    | 349.8          | 44.7 | 0.40             | 0.000   | 1.93    | 0.000   | 3882.6         | 48.6 | 0.43             | 0.000   | 2.24    | 0.000   | 255288.9       | 36.4 | 0.32             | 0.000   | 1.38    | 0.003   | 4708.1         | 34.3 | 0.30             | 0.001   | 1.26    | 0.025   |
|       | 2    | 154.0          | 19.7 | 0.29             | 0.817   | 0.80    | 0.953   | 1558.5         | 19.5 | 0.31             | 0.402   | 0.87    | 0.858   | 195528.2       | 27.9 | 0.36             | 0.001   | 1.11    | 0.211   | 3671.4         | 26.8 | 0.34             | 0.027   | 1.00    | 0.506   |
|       | 3    | 149.7          | 19.2 | 0.40             | 0.302   | 0.65    | 0.998   | 1392.1         | 17.4 | 0.39             | 0.332   | 0.64    | 0.998   | 136972.1       | 19.5 | 0.40             | 0.311   | 0.65    | 0.998   | 2776.9         | 20.2 | 0.38             | 0.535   | 0.61    | 0.999   |
|       | 4    | 128.3          | 16.4 | 0.56             | 0.283   | 2.54    | 0.000   | 1160.0         | 14.5 | 0.54             | 0.563   | 2.34    | 0.000   | 114204.8       | 16.3 | 0.54             | 0.509   | 2.38    | 0.000   | 2563.2         | 18.7 | 0.57             | 0.155   | 2.68    | 0.000   |
| AMMI2 | 1    | 352.0          | 44.9 | 0.40             | 0.000   | 1.94    | 0.000   | 3996.4         | 48.3 | 0.43             | 0.000   | 2.23    | 0.000   | 255111.6       | 36.4 | 0.32             | 0.000   | 1.38    | 0.003   | 4709.2         | 34.3 | 0.30             | 0.001   | 1.27    | 0.024   |
|       | 2    | 154.0          | 19.6 | 0.29             | 0.815   | 0.80    | 0.952   | 1726.7         | 20.9 | 0.31             | 0.397   | 0.96    | 0.612   | 195556.4       | 27.9 | 0.36             | 0.001   | 1.11    | 0.210   | 3671.7         | 26.8 | 0.34             | 0.027   | 1.00    | 0.505   |
|       | 3    | 149.7          | 19.1 | 0.40             | 0.301   | 0.65    | 0.998   | 1391.3         | 16.8 | 0.39             | 0.333   | 0.64    | 0.998   | 137022.0       | 19.5 | 0.40             | 0.313   | 0.65    | 0.998   | 2779.2         | 20.3 | 0.38             | 0.538   | 0.62    | 0.999   |
|       | 4    | 128.2          | 16.4 | 0.56             | 0.284   | 2.53    | 0.000   | 1165.1         | 14.1 | 0.54             | 0.561   | 2.38    | 0.000   | 114022.2       | 16.3 | 0.54             | 0.511   | 2.37    | 0.000   | 2562.1         | 18.7 | 0.57             | 0.155   | 2.68    | 0.000   |
| AMMI3 | 1    | 538.3          | 54.5 | 0.49             | 0.000   | 2.87    | 0.000   | 3959.1         | 48.3 | 0.43             | 0.000   | 2.23    | 0.000   | 254779.7       | 36.3 | 0.32             | 0.000   | 1.38    | 0.004   | 4724.7         | 34.3 | 0.30             | 0.001   | 1.27    | 0.024   |
|       | 2    | 171.1          | 17.3 | 0.31             | 0.291   | 0.89    | 0.816   | 1687.1         | 20.6 | 0.32             | 0.104   | 0.94    | 0.677   | 195614.1       | 27.9 | 0.36             | 0.001   | 1.11    | 0.210   | 3675.9         | 26.7 | 0.34             | 0.029   | 0.99    | 0.511   |
|       | 3    | 152.9          | 15.5 | 0.40             | 0.196   | 0.67    | 0.996   | 1391.5         | 17.0 | 0.39             | 0.326   | 0.64    | 0.998   | 137126.5       | 19.6 | 0.40             | 0.305   | 0.65    | 0.998   | 2813.2         | 20.4 | 0.39             | 0.456   | 0.62    | 0.999   |
|       | 4    | 126.2          | 12.8 | 0.56             | 0.327   | 2.50    | 0.000   | 1164.4         | 14.2 | 0.54             | 0.507   | 2.38    | 0.000   | 113691.5       | 16.2 | 0.54             | 0.544   | 2.36    | 0.000   | 2551.2         | 18.5 | 0.57             | 0.159   | 2.67    | 0.000   |
| AMMI4 | 1    | 351.5          | 44.4 | 0.39             | 0.000   | 1.91    | 0.000   | 4205.2         | 48.6 | 0.44             | 0.000   | 2.27    | 0.000   | 256897.9       | 36.5 | 0.32             | 0.000   | 1.39    | 0.003   | 4718.0         | 34.3 | 0.30             | 0.001   | 1.27    | 0.024   |
|       | 2    | 158.9          | 20.1 | 0.29             | 0.680   | 0.82    | 0.928   | 1897.0         | 21.9 | 0.35             | 0.005   | 1.06    | 0.333   | 195329.5       | 27.7 | 0.36             | 0.001   | 1.10    | 0.220   | 3674.1         | 26.7 | 0.34             | 0.028   | 1.00    | 0.507   |
|       | 3    | 152.8          | 19.3 | 0.40             | 0.210   | 0.66    | 0.996   | 1390.8         | 16.1 | 0.39             | 0.330   | 0.64    | 0.998   | 136641.2       | 19.4 | 0.39             | 0.346   | 0.64    | 0.998   | 2798.2         | 20.4 | 0.39             | 0.483   | 0.62    | 0.999   |
|       | 4    | 127.6          | 16.1 | 0.56             | 0.272   | 2.55    | 0.000   | 1167.3         | 13.5 | 0.55             | 0.494   | 2.39    | 0.000   | 116014.4       | 16.5 | 0.55             | 0.434   | 2.42    | 0.000   | 2555.0         | 18.6 | 0.57             | 0.154   | 2.68    | 0.000   |

**Table S9.** „Winner“ RILs within each environment for both populations examined.

| Environment          | Trait |       |       |       |       |       |       |
|----------------------|-------|-------|-------|-------|-------|-------|-------|
|                      | GPC   | WGC   | TW    | MPT   | MTW   | MTI   | MPH   |
| <b>BK population</b> |       |       |       |       |       |       |       |
| OS09                 | BK032 | BK032 | BK012 | BK042 | BK131 | BK059 | BK037 |
| OS10                 | BK032 | BK032 | BK037 | BK042 | BK041 | BK040 | BK040 |
| OS11                 | BK007 | BK007 | BK012 | BK131 | BK083 | BK057 | BK032 |
| SB09                 | BK007 | BK007 | BK012 | BK124 | BK032 | BK059 | BK059 |
| SB10                 | BK034 | BK024 | BK048 | BK042 | BK017 | BK039 | BK039 |
| <b>MG population</b> |       |       |       |       |       |       |       |
| OS09                 | MG124 | MG124 | MG089 | MG180 | MG169 | MG002 | MG166 |
| OS10                 | MG124 | MG084 | MG016 | MG116 | MG116 | MG104 | MG027 |
| OS11                 | MG120 | MG193 | MG155 | MG150 | MG035 | MG031 | MG031 |
| SB09                 | MG124 | MG124 | MG192 | MG188 | MG016 | MG035 | MG096 |
| SB10                 | MG124 | MG084 | MG124 | MG016 | MG001 | MG108 | MG108 |
| SB11                 | MG124 | MG124 | MG087 | MG142 | MG136 | MG009 | MG009 |
